# Supplementary material for: Dengue virus infection among long-term travelers from the Netherlands: A prospective study, 2008-2011
Source: PubMed Central journal article supplement (PMC5802908; doi:10.1371/journal.pone.0192193), 2018-02-07

To: Mr GJB Sonder  
LCR  
Nieuwe Achtergracht 100  
1018 WT Amsterdam  
The Netherlands

From: Femke Overbosch  
GGD Amsterdam  
Nieuwe Achtergracht 100  
1018 WT Amsterdam  
The Netherlands

Subject: Permission to use figure

4 January 2018

Dear Mr Sonder,

I request permission for the open-access journal PLOS ONE to publish 'the world map' of the LCR in our submitted article 'Dengue virus infection among long-term travelers from the Netherlands; a prospective study, 2008-2011' under the Creative Commons Attribution License (CCAL) CC BY 4.0 (<http://creativecommons.org/licenses/by/4.0/>).

Please be aware that this license allows unrestricted use and distribution, even commercially, by third parties.

Please reply by completing next paragraph in which you provide explicit written permission to publish the world map under a CC BY license."

I provide permission to publish figure 1

Signature: .....

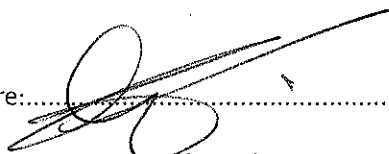

**g.j.b. sonder, arts**

Director LCR

Date: 9 January 2018

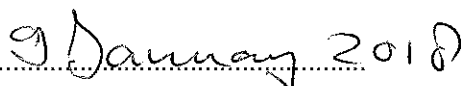

Kind regards,

Femke Overbosch



Supplement: pone.0192193.s001.pdf [file pone.0192193.s001.pdf]
